# Supplementary material
Source: Springer Nature journal article supplement (http://www.springermedizin.de/resource/supplementary/13063_2009_366_MOESM3_ESM.pdf/9618074)

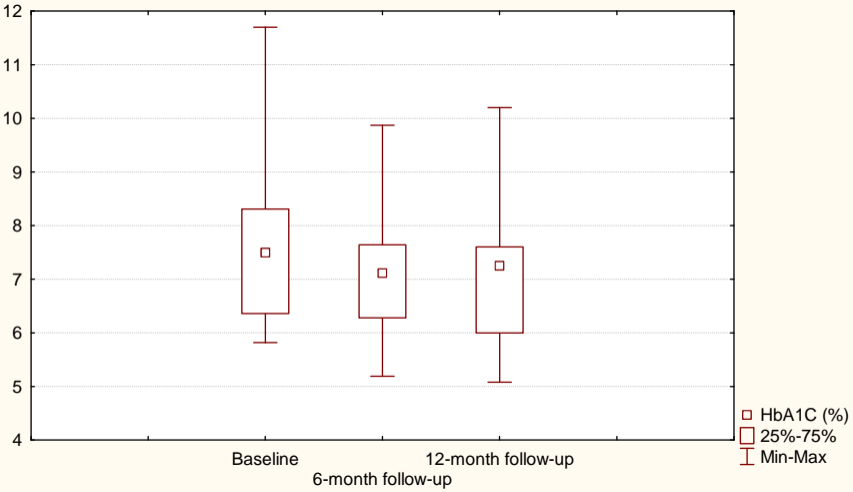

Supplement: MOESM3 [file 9618074]
